# Supplementary material
Source: publisher figshare collection journal article supplement (https://tandf.figshare.com/articles/dataset/_/1228037)
Supplement: Supplementary file 1 [file 2]

JOURNAL OF VERTEBRATE PALEONTOLOGY

SUPPLEMENTARY DATA

*Tacuarembemys kusteræ* gen. et sp. nov., a new Late Jurassic–?earliest Cretaceous continental turtle from  
Western Gondwana

DANIEL PEREA,<sup>1</sup> MATÍAS SOTO,<sup>1,\*</sup> JULIANA STERLI,<sup>2</sup> VALERIA MESA,<sup>1</sup> PABLO TORIÑO,<sup>1</sup>  
GUILLERMO ROLAND,<sup>1</sup> and JORGE DA SILVA<sup>3</sup>

<sup>1</sup>Departamento de Evolución de Cuencas, Facultad de Ciencias, Universidad de la República. Iguá 4225,  
Montevideo, Uruguay, perea@fcien.edu.uy, matiassoto1@gmail.com, vmesa@fcien.edu.uy,  
paleopablo@yahoo.com.ar, guillermo.roland@gmail.com;

<sup>2</sup>Museo Egidio Feruglio. Av. Fontana 140, 9100 Trelew, Chubut, Argentina, jsterli@mef.org.ar;

<sup>3</sup>Museo de Geociencias de Tacuarembó. Gral. Artigas 191, Tacuarembó, Uruguay, geocien@hotmail.com

APPENDIX S1. Data set used in the phylogenetic analysis.

*Sphenodon punctatus*

0000100101000-0---0-00-000-10100-00?----00000?00---0-00120-0000000---00-0100000-10000-???0--0-  
1124?1-----000-0-----010-00-----0-00---100000--  
00--??0?1-1-10--00110000100-5

*Simosaurus gaillardoti*

0110?01111100-0--?-1000-010000100-000---00100000---0-0212--1020-01--001-01-1100??----???????-  
?????1-----000--0-----0?00?0-----?-00----1???00--00-  
-?????-0??1--0??1?????????

*Owenetta kitchingorum*

000100010102?-0--?0000000000?0000000?---0000?0000000-0?000-000000?-0-00-?-0?0000000000????0-  
-0-1124?1-----010-0-----0??-??-----?-0----1???00--  
00--??0?1-??0--00?1?????????

*Anthodon serrarius*

0000?0000020-0--?00000000000000000000---00000000000-0-?0020-0000000-0-  
000010?000000000?0000--0-1124?1-----010-0-----  
?????------?-0----100000--00--01--0-1-10--00?1?00???0??

*Odontochelys semitestacea*

0000?01?000?0?-0?000?0?000?00?00?-0--?0?000?0000?0-0?000-00?0?002-00-?00?????0000????0-  
??-????????????????010-0----00-----100--0?0000?0-0--00????????????000?00-----  
?00?---100000--01-0?0010100?--??0100??01?

*Proganochelys quenstedti*

0000?00000000-0--?0000000000000000000001-0000010000000-0?000-000001000-00-  
000100000000000?00--0?000000011110-011100001100010-00?000000??--000-?000--  
0000000?00?00?0000000010000000??010000-----00000000000000-001000000001000--  
00?000000000?

*Proterochersis robusta*

????????????????????????????????????????????????????????????????????????????????????  
????????????????????0010-????00?0??-0110?000--0010000?00?00?100000000000000000-  
????????????????????????????????10?????1?0?1?000?????????

*Palaeochersis talampayensis*

0000?00100000-1--?0100000000000000?00?00-0?1?0?0110000-0?110-000001000000-  
000?1110?0000????0--0???0????????????????1100010-?0???0?0?0?--????000--  
0010000?00?00?0000????0?????0???110000-----000000?010000--01000?00121000????00000???00?

*Australochelys africanus*

???????10?0?0?1--?0?00?00?000?0?00?001-?0?0?1?110000-0?10-00000?00?00?-????1110?00?????0--  
0?0?0????????????????11????????????????????????????????????????????????????????  
????????????????????????????????????????????

*Kayentachelys aprix*

0010001111000-0--?010000000000?10?000001-1010000120110-00010-000000002000-  
0010101101000?1000--0?000000?00000000000?1110010-00000[0 1]1000000021000100--  
0010000?000000000000010000000000-0?0?00-----?0000001?0000--111?0?00?01001--00?1?00?????

*Condorchelys antiqua*

??????????0?-?0?????000????????????120?10-0?110-00?0?000[0 2]0??-  
?01?1011?1000???0--0?0000????????????1?0010-???0?1?0001???00??10--  
001000?????????0? ??????0?0?????010?00?-??----0?00?0?1?00?0--11??0000?0100???0?1????????

*Heckerochelys romani*

0?00??1100??0?-?01?????0??1????????1?1???12??1?0?110-00?0?200200?-??1?10120?000???11-  
0?0000????????????????0010-00000?10?00100?10?0110--1100001?000000000000010000000000-  
????0-----??????0?0??0--?11?????0????--??1????????

*Eileanchelys waldmani*

00000?111100??0?-10100000?0000?100000?0??1?1000?1202?0-0?12?-00????00?00?-  
?0001012?1000?0011-0-????????????????1100?10-?0001?00001002100???0--  
1?0000?0?0?000?00?00?0?0?0????????????????????1????????????????????

*Indochelys spatulata*

????????????????????????????????????????????????????????????????????????????????  
????????????????????0010-?000?00001??2100??0--  
0?0000?0?0?000????1????????????????????????????????????1????????????????????

*Siamochelys peninsularis*

????????????????????????????????????????????????????????????????????????????????  
????????????????????00111?000111000010021110100--1?10000?01001000000010000000000-  
????????????????2????????????????????????????????????

*Niolamia argentina*

000000011000??0?010100010120?0110?000001-10101102200?100[0  
1]12101000?000111100010101??00[0 2]01??01??0-0101?00000[0 1]00[0 1]000[0 1]1101100?10-  
????????????????????????????????????????????????????????????????????????????0?0??101????????  
????????????????

*Ninjemys oweni*

0??????1????0??0?0?0??20??1?000?00211?1011??2????????????0??????1?0????????????????  
?????011000000011001111????????????????????????????????????????????????????????  
????????????0?0??101????????????????????

*Warkalania carinaminor*

????????????0????????????????????????20031????????????????????????????????  
???011101--  
011????????????????????????????????????????????????????????????????????????  
????????????????????

*Meiolania platyceps*

0000000110001-000101000101200011000000021101011022003100012111000[0  
1]0001111000101012000[0 2]011001[0 1]?0-010100111111011110111100010-  
000??10000??00210?1110--  
1010000?0?1?0000000001000??????01000111200000000000?00122011111100000001001--  
00??000?000?

*Chubutemys copelloi*

??0000110001100??0?000?00?00?11?????0?111000?120211?0?122-000000000?1?-  
?00?101200010?0??11-

*Prochelidella cerrobarcinae*

????????????????????????????????????????????????????????????????????????????????????  
????????????????????????0010-??10110010000021110100--11100001?0?1??10001001000000001--  
????????????????????????????????????????????????????????????????????????????????

*Elseya dentata*

0110111111001100-?0101--100001110000110201011000320230-02122-01000-00-010-  
0100100200000110111-??112301-----110001??10?0-1?1200?10211-0000--  
1110000?10021010001001?00?00001--10?0111131000010?0201011??10--  
1122?0?0?1??11100?110011????

*Myuchelys latisternum*

0110111111001100-10101--1000011100001100-1011000320230-02122-01000-00-010-  
0100100201000110111-0?112301-----110001??1010-1?1200010211-0000--  
1110000110021110001001000000001--1000111131000010002010111110--  
1122?00011001111000110011????

*Chelodina colliei*

0110111111111100-12101--1000011100001100-101?000320230-12122-01000-00-  
00001100100200000110111-2?112301-----11100110101001?1200000211-0000--  
1110000110120110001011000000001--1000111131000010102010111110--  
112211001100111100011001100??

*Chelodina longicollis*

0110111111111100-12101--1000011100001100-1011000320230-12122-01000-00-  
00001100100200000110111-2?112301-----111001101010-111200000211-0000--  
1110000110120110001011000000001--1000111131000010102010111110--  
11221100110011110001100110002

*Yaminuechelys maior*

0?1?????1100?0?-?2?????1000?1????0?0?0?????????????0-???22-????-00-0000?10?100??0000????11-  
??1123?1-----11100110100011?010000021110110--1110000110111010001001000000001--  
100?1111310000101020101????0--11?2?0?0?1????01???1?????????

*Phrynops geoffroanus*

0110111111001100-12101--1000011100001100-1011000320230-02122-01000-00-  
00001100100200000110111-2?112301-----1110010-1010111010000021110000--  
1110000110121010001001000000001--1000111131000010002010111110--  
11221000110011110001100110006

*Chelus fimbriatus*

1--0101111001100-12101--1000011110000100-1010000320230-02122-01000-00-  
00001100100200000110111-2-112301-----1110210-1010011001000021110000--  
1110000110121111001020100100001--1011111131000010102010111110--  
11221000110011110001100110000

*Arapipemys barretoii*

1--1??011101110?-1211000100001110000?000-?11?0?3212?0-02122-01010-00-  
0???01001002??000?0111-0-1123?????????????????111021121010110011001021110110--  
11110111101201100011---00000101--100?111100000010102??0111110--  
11221?0011?????????110011000?

*Erymnochelys madagascariensis*

1--1110111011100-?010000100001110000010202111-00321230-12122-01000-01-  
0100010?100200000110?11-?-112-00-----1100010-1010111010001021110000--  
1110000110011010001001100100001--100011110000001000201011??10--  
112??0??100111100?110011???

*Pelomedusa subrufa*

1--1110111011100-1210000100001110000010202111-00321230-[0 1]2122-01000-00-  
01000100100200000110111-0-112300-----1100010-1010111010001021110000--  
1110000110111010001001000000001--1000111100000010002010111110--  
11221000110011110001100110005

*Podocnemis expansa*

1--1110111011100-1010000100001110000110212111000321230-12122-01001-01-  
01000100100200000110111-2?112-00-----1100010-1010111010001021110000--  
1110000110111010001001000100001--1000111100000010002010111110--  
11221100110011110001100110005

*Dorsetochelys delairi*

0010001111001?0??01000000000?110?000100-10100??220211?01122-100002002000-  
000?1012?1020?10?11-0?1120?1-----  
11????????????????????????????????????????????????????????????????????????  
????????????????????????

*Pleurosternon bullockii*

0110?1111011100?01000000000?110000??0-1?10??0220211?01122-  
?00102?020?0?0??101200020?10?????001011-----11?00111?00011?000001021011000--  
1?0000?01010000010010000000000-00??0-----?0?00?????????1??????0??1--00?????????

*Glyptops plicatulus*

01100?11110?11?0?0100?0?00?110?01?001-1?1?00220211?01112-10010200200?-  
?01?102200020010011-2?0010?1-----11000111100011?000010021011000--  
11100001101010000000010000000000-?00010-----?0?001010??0--1112000010???1--00?1?????????

*Dinochelys whitei*

0?10?11110??00??0100000?00??10?01????????????20?11????2-  
??????0?0??????0?0????10????????????????????11000111?0011?000010021011000--  
1110000?000?0000000010000000[0 1]1--00??0-----??0?1?1??????11?????0????????10011???

*Neurankylus eximius*

??0?11?10?11?00?1?????000?01????????????220?11002122-  
10?0?00?000001001?2200010010011-??11221????????????11?00111100011?000010021111000--  
1110000?10?01?00000010000000000-????????????101?????????1??????0???--???????????

*Trinitichelys hiatti*

0010002111011100??110000000000110000?100-101?0002202110?2122-  
1000020020000010?1022000?0010011-0?112211-----1100011110?01?0?0?002111?000--  
1110000?10?01?00000011000000?00-?00?0-----?????10????????1??????0?????????????

*Plesiobaena antiqua*

00100021110111000?1100000000001100000100-1010000220211002122-  
1000020020000011?102200010010011-??112211-----11000111100011?0000?0021110000--  
1110000?10?01?00000021?000000100-0000?11????????101010?00--?1??????0??1--0?110011???

*Boremys pulchra*

00100021110111000?110000000000110000?1???101?0?0220211002122-  
10001?00?000001?010220001001001???112211-----11000111100011?000012121110000--  
1110000?10?01?0000021?000000?00-010010-----???1010112100--?12?????0????--???????????

*Baena arenosa*

???00021110011000?0100000000001100000001-1010000220211002122-100002002000-  
011?102200010010?11-??112210????????????11000111101011?000002121110000--  
1110000?10111?000000211000000100-?10?10-----000?1010112200--11220000101001--0011?????????

*Chisternon undatum*

0010002111001100??1100000000001100000101-1010000220211002122-  
1000120020000011?102200010010011-0?112211-----110001??100011?0000?21211-?000--  
1110000?10?01?00000021100000010??000?1112?0000?0?101011??00-??1?2?000101001--  
0011????????

*Portlandemys macdowellii*

00110001110?10010?1?????000001100000101-1010000220211001122-  
1000021020???0100101200010010011-  
0?112100????????????110????????????????????????????????????????????????????????  
????????????????????????????????????????????????????????????

*Plesiochelys etalloni*

00110001110[0 1]10010?1100000000?01100000101-1010000220211001122-  
101002002010001?01012000100100????112100????????????1100010?100011?0000120210100[0 1]0-  
-1110000?10?210000000010000000000-????????????0010??????11???0010????1--0?110011???

*Solnhofia parsonsi*

00110001110[0 1]10000?110000?00000110000-110-1110--0220211001122-  
10000010101000110102200010010011-0?112100????????????1100010-??0011?000020?2101?110--  
??0011?0002000000?0000?00?0?110?00-----?????1?10?????112?0010?0??--??110011000?

*Thalassemys moseri*

00100011110011010?1100000000001100000?01-1110000220211001122-1010-  
?102000001?10220001?010011-0?112100????????????11?001??10001??0?0???2?0???10--  
???????1?02????00?????0?0?0???11?00-----0?0?1?????????1????????????????????

*Santanachelys gaffneyi*

0010000111011000??0100000000?0110?00?101-111000022021100?122-1010-  
?002010?01??102?001?010?1???????0????????????110001??000011?00100?02100?110--  
1110010?00120?00?0????????????11?????????0???0?1?1?????112????0????--0?111011?1??

*Chengyunchelys*

????????????????????????????????????????????????????????????????????????????????  
????????????????0011-?000??0000?2021101100--  
1110000?0000000000000000000010????????????????????????????????????????????

*Xinjiangchelys latimarginalis*

????????????????????0????????????????2????????2????????1?????10?????????  
????????????????001??100011100000002111100--1110000?00020000000001000000100-  
110010-----1???201011?00--111?????0???1--0?1???????

```
00110001110011000?110000000000110000010??101000022?21100?122-
100102002010001?01022?102?01001??0?0111?0??????????????11?001??10?0?1?0000?002111?100--
1110001?00?20?000001-1?000000[0 1]00-
110??111200000????2?10?????????1??????0???????????????????
```

???1??01110?1100??110000?0000011???0??0??101?00?220211?0?122-  
100002?020100000?10220101001001??0?0111?1-----110001??100011?000010021110100--  
1110011?000200000001-1?000000[0 1]00-?11?011120000010012?10111210--11?2000010???1--  
00?11001100??

??10?0111011100??210000?000??1100000001-101000?220?11001122-  
100002102010?010?1022??01001001??0?0111?1-----110001??100011?00001?0?111?110--  
???011?000200000?????????????0111?110-0000010?00010?????0--11?20?0010??????????00-?????

```
00100001110?1100??2?0000?000?0110000????1010?0220211?1112-
10000??0?010?00??1022010??010?????0?1????????????????11?0010-
100011100001002111011?????00?-?0002000000???10?0?0?0100-01?00111210000?00?0?10111210--
11?20?001000?1--00?1????????
```

0010??11110111000?210000?000??11??00???0-??1????22022110?122-  
00000?002010?00001022?10?001001??0?011101-----110001??10001110000110211101[0 1]0--  
111001-?0002000000??1?0?000?0????0????0???????0??1???????1??????0?????????10011000?

1011000111011?00011100000000101100000100-101000022021100?122-  
10000210201000100102200110010011-0?1121??-----1100010-2000110001010?21110110--  
111001110022010100???1?0???010??11?10111200??0????01011?00--11??????00???-0?111011?1??

1--100011[0 1]00120001010000000010110100-110-101100020111101122-1020-  
010101000110102210110010011-0?11?100-----1100010-2000100001010021110110--  
1110011100220?010001---10?00000??1111011120001110002011111110--1122111-100111--  
0001120110103

1--1?0011100120001010000000010110101-11201011000220111001122-1020-  
010101000110102210110010011-0?112100-----1100010-2000110001010021110110--  
1110011100220?010001---10?0?000??1111011120001110012011111110--1122111-100111--  
00011201101?3

????????????????????????????????????????????????????????????????????????????????????10????????????????????????????  
 ?????????????????????01010-200011000100??2???-110--1110011?00?20?011-----  
 1110011120000000002010111110--1122111-101111--0001?20???1?





*Chelonoidis chilensis*

1--100011101110011210000100000110000000201010110220221001122-  
10001000201000100102200010010010100112101-----1100010-1010010000111021100000--  
1110000000021?100001-1-0000100010110101112101011101201111110--1122[0 1]001101011--  
0001000111001

*Stylemys nebraskensis*

1--1??0111011?0???21000010000?11?????0???1????202?1?0?122-  
?0?????0????????10????0?????????01121?1?????????????11?0010-?0?0?10000010021110000--  
1110000110122?100001-1-0000100010????????????????????????????11?2100111100?--??1100011000?

*Chrysemys picta*

1--100011101110011210000100000110000000201010000220211001122-  
00001200201000101102200010010010100112101-----1100010-1010110000000021110000--  
11100001101210100001-1-0000100010111101112111011101201111110--11221001101011--  
0011100110000

*Trachemys scripta*

1--100011100110011210000100000110000000211010000220211001122-  
10001200201000101102200010010010100112101-----1100010-1010110000100021110000--  
11100001101210100001-1-000000001011?-0--1211101110?2011--??-0----21001101011--0011-----0000

*Emys orbicularis*

1--100011001110011210000?000001100000?00-1010000220211001122-  
00001200201000101102200010010010100112101-----1100010-  
10101100000000211101010010100001001201000001-1-  
0010000???111101112101011101201111111???11221001101?11--00?1100110000

*Geoclemys hamiltonii*

1--1000110011100112110001000001100000000-1010110220211001122-  
10001210201000101102200010010010100112101-----1100110-1010111000010021110000--  
11100000101211100001-1-0010100010111101112101011101201111110--11221001101011--  
001110011000?

*Echmatemys wyomingensis*

????????????????????????????????????????????????????????????????????????????????????  
????????????????????????0010-101011?0000?0021110000--11100001100211100001-1-  
0010000010????????????????201????????112?????0???1--?0??????????

*Emarginachelys cretacea*

1--1000111?111000??100001000?0110000????1010??1220211??1122-  
100012????10?01??102200??010??????????1-----11?011??11?0?1?000????21110100--  
11100?0?0??20?000001-1-00????00??11???111??????????1????????112?????0???1--01?110011????

*Baptemys wyomingensis*

1--10001110111000?2100001000001100000002?1010001220211001122-1000[0  
1]?002?10001?01022?001?0-2-1??0?112101-----1100110-100011?0000?0021110000--  
1110000110121?000001-1-001100000-11?1?111?????????2?1111?1???1122?????01???1--1??110011????

*Dermatemys mawii*

1--100011[0 1]0111000?210000100000110000000201010001220211001122-  
100012002010001101022000100-2-1010?112101-----1100010-1[0 1]00111010000021110000--

1110000?101200100001-1-100100000011110110-001011101201111??10--11221001101101--  
00?1100110003

*Xenochelys formosa*

1--10?01100?1100112?????00???10?010000-1?10?0?2????1?01122-?020-  
0??20?????0????001??110?????1121?1-----11?0110-1?10121010000021110000--  
11100001002201100001-1-00-1-20011????????????????????????????????????????????????

*Staurotypus triporcatus*

1--100011001110011211010100000110001?000-1010001220211101122-  
10001000201000100102200010011010101112101-----1100210-11001210[0  
1]00000211100010111100101002201000001-1-00-1-200111110111100101110121-1111?10--  
11221001100101--110110011??3

*Sternotherus odoratus*

1--1000110011100112100101000001100000000-1010001220211101122-  
10001000201000100102200010011010101112101-----1100110-110012111000002111000101---?1-  
-1002201000001-1-11-1-2001111110111100101110121-1111110--11221001101101--1101100110003

*Kinosternon flavescens*

1--1000110011100112100101000001100000000-1010001220211101122-  
1000100020100010010220001001101??01112101-----1100110-110012011000002111000111---?1-  
-1002201000001-1-11-1-200111111011110???1110121-1111110--11221001101111--11011001100?3

*Basilemys variolosa*

1--1?0111?1?00??10000100?00110?00??????1????20?21???122-  
?0????????????10?????????????????????????????????11000112101111?0[0 1]0000?2111000--  
1110000100?20?000100[0 2]11001000001011?1?1?0-0????????????????????12?????01011--  
00?1000??000?

*Yehguia tatsuensis*

????????????????????????????????????????????????????????????????????????????????  
????????????????????00112????11??000?02???1000--1110000?0?2?000100010000000000-  
????????????????????????????11?????0??????11???????

*Adocus beatus*

1--100011101110011210000100100110000010211010001220211101122-  
100012102?10101?010220001?010011-1?011100????????????1100010-101111?0[0 1]00?0021111000--  
11100001000200000100010001010000-1111?100-0010111012?111?????11220001101011--  
011110011???

*Hoplochelys crassa*

????????????????????????????????????????????????????????????????????????????????  
????????????????????0210-11?0?1?000?0?21110000--1110000000020?000001-1-00-1-1000-  
????????????????201??????1122????????--??????????

*Apalone spinifera*

1--1010111011100112110001001001112101001-111100122021101122-  
10011210101010100102200010010011-12112101-----11020112100013001-03-----110--111101-  
100-20-0-1----1-----11010120-001011100201-111110--11221101100111--0001101110014

*Plastomenus aff. thomassii*

1--10?011101110?11211000100?0?11----1000-111100?220221101122-  
100112101010101001022?0010??00101121121?1-----11020112100013001-03-----100--????101-  
0-2--??1-----????????????????20??1????????????????????????????

*Pelodiscus sinensis*

1--10101110111001121100010010011?2??1000-1111001220221101122-  
10010210101010100102200010010011-1?1121?1-----11?20112100013001-03-----110--  
11110101-0-2--001-----110?0120-00?01110020--11??10--?1????0????????????????001?

*Lissemys punctata*

1--1010111011100112110001001001112101000-1111001220221101122-  
10011010101010100102200010010010012112101-----11020112100013001-03-----110--111101-  
101-20-0-1----1-----11010120-001011100201-11--10--11221101100111--0101101110014

*Shachemys laosiana*

1--1??011101??0?11[1 2]?????00??11??????????????2??????122-  
10001??0?0???10110???0010?1?0?????1121????????????????11?0010-??10-1?[0 1]200010210-0100--  
1110000?000201000000010001000000-????????????????????1????????????????????????????

*Anosteira ornata*

1--1??0111?1??001??10000100??011?200?????1111??220221??122-1001[0  
1]0?0?010?01??1022?0??010?????????01-----11?1011210001200100300211?-100--  
11100101002201001----1-----????????????????????????1????????????--??110211????

*Carettochelys insculpta*

1--1010111011100112100101001001112000000-1111001220221101122-  
10011010101010100102200010010011-1?112101-----11010112100012001000--2----100--  
11100101002201001----1-----11010110-001011100201111110--1122001-100111--0101102110004

APPENDIX S2. List of common synapomorphies to all 240 most parsimonious trees (MPTs). Node numbers correspond to node numbers in the strict consensus tree (see Supplementary Data 3).

*Sphenodon punctatus* :

All trees:

No autapomorphies:

*Simosaurus gaillardoti* :

All trees:

Char. 1: 0 --> 1

Char. 2: 0 --> 1

Char. 6: 0 --> 1

Char. 8: 0 --> 1

Char. 10: 0 --> 1

Char. 19: 0 --> 1

Char. 25: 0 --> 1

Char. 43: 0 --> 1

Char. 56: 0 --> 2

Char. 61: 0 --> 1

Char. 63: 0 --> 2

Char. 67: 0 --> 1

Char. 72: 0 --> 1

Char. 78: 0 --> 1

Char. 222: 1 --> 0

Char. 225: 0 --> 1

*Owenetta kitchingorum* :

All trees:

Char. 3: 0 --> 1

*Anthodon serrarius* :

All trees:

Char. 7: 1 --> 0

Char. 220: 1 --> 0

*Odontochelys semitestacea* :

All trees:

Char. 69: 0 --> 2

Char. 183: 1 --> 0

Char. 232: 0 --> 1

*Proganochelys quenstedti* :

All trees:

Char. 7: 1 --> 0

Char. 204: 1 --> 0

Char. 220: 1 --> 0

Char. 236: 1 --> 0

*Proterochersis robusta* :

All trees:

Char. 163: 0 --> 1

Char. 221: 0 --> 1

*Palaeochersis talampayensis* :

All trees:

Char. 39: 1 --> 0

*Australochelys africanus* :

All trees:

No autapomorphies:

*Kayentachelys aprix* :

Some trees:

Char. 57: 1 --> 0

Char. 119: 0 --> 1

Char. 136: 1 --> 0

*Condorchelys antiqua* :

All trees:

No autapomorphies:

*Heckerochelys romani* :

All trees:

Char. 151: 1 --> 0

Char. 155: 0 --> 1

*Eileanchelys waldmani* :

All trees:

No autapomorphies:

*Indochelys spatulata* :

All trees:

No autapomorphies:

*Siamochelys peninsularis* :

All trees:

Char. 162: 0 --> 1

Char. 200: 01 --> 2

*Niolamia argentina* :

All trees:

Char. 111: 1 --> 0

Char. 112: 1 --> 0

Char. 114: 0 --> 1

*Ninjemys oweni* :

All trees:

Char. 106: 1 --> 0

*Warkalania carinaminor* :

All trees:

No autapomorphies:

*Meiolania platyceph* :

All trees:

Char. 105: 0 --> 1

*Chubutemys copelloi* :

All trees:

Char. 42: 0 --> 1

Char. 85: 2 --> 1

*Mongolochelys efremovi* :

All trees:

Char. 39: 1 --> 2

Char. 77: 0 --> 1

*Peligrochelys walshae* :

All trees:

No autapomorphies:

*Patagoniaemys gasparinae* :

All trees:

No autapomorphies:

*Otwayemys cunicularius* :

All trees:

Char. 160: 1 --> 2

Char. 170: 1 --> 0

Char. 177: 0 --> 1

*Kallokibotion bajazidi* :

All trees:

Char. 145: 1 --> 0

Char. 187: 1 --> 0

Char. 205: 1 --> 0

*Platychelys oberndorferi* :

All trees:

Char. 139: 2 --> 1

Char. 226: 1 --> 0

*Caribemys oxfordiensis* :

All trees:

Char. 224: 1 --> 0

*Notoemys laticentralis* :

All trees:

Char. 136: 0 --> 1

*Sinemys lens* :

Some trees:

Char. 6: 0 --> 1

Char. 52: 1 --> 2

Char. 61: 1 --> 0

Char. 137: 0 --> 1

*Tacuarembemys* :

All trees:

Char. 138: 0 --> 1

*Prochelidella cerrobarcinae* :

All trees:

No autapomorphies:

*Elseya dentata* :

All trees:

Char. 39: 0 --> 2

*Myuchelys latisternum* :

All trees:

Char. 83: 0 --> 1

Char. 162: 0 --> 1

*Chelodina colliei* :

All trees:

No autapomorphies:

*Chelodina longicollis* :

All trees:

No autapomorphies:

*Yaminuechelys maior* :

All trees:

Char. 123: 0 --> 1

Char. 127: 1 --> 0

Char. 145: 0 --> 1

*Phrynops Geoffroyanus* :

All trees:

No autapomorphies:

*Chelus fimbriatus* :

All trees:

Char. 0: 0 --> 1

Char. 5: 1 --> 0

Char. 32: 0 --> 1

Char. 36: 1 --> 0

Char. 44: 1 --> 0

Char. 121: 0 --> 2

Char. 134: 0 --> 1

Char. 164: 0 --> 1

Char. 170: 1 --> 0

Char. 171: 0 --> 1

Char. 174: 0 --> 1

Char. 184: 0 --> 1

Char. 185: 0 --> 1

*Araripemys barretoii* :

All trees:

Char. 20: 0 --> 1

Char. 37: 1 --> 0



Char. 64: 0 --> 1  
Char. 119: 0 --> 1  
Char. 121: 0 --> 2  
Char. 123: 0 --> 1  
Char. 131: 1 --> 0  
Char. 134: 0 --> 1  
Char. 144: 0 --> 1  
Char. 145: 0 --> 1  
Char. 152: 0 --> 1  
Char. 154: 0 --> 1  
Char. 155: 0 --> 1  
Char. 161: 1 --> 0  
Char. 162: 0 --> 1  
Char. 168: 0 --> 1  
Char. 177: 0 --> 1  
Char. 198: 0 --> 1

*Erymnochelys madagascariensis* :

All trees:

Char. 159: 1 --> 0  
Char. 171: 0 --> 1

*Pelomedusa subrufa* :

All trees:

No autapomorphies:

*Podocnemis expansa* :

All trees:

Char. 36: 0 --> 1  
Char. 40: 0 --> 1  
Char. 65: 0 --> 1

*Dorsetochelys delairi* :

All trees:

Char. 83: 0 --> 1

*Pleurosternon bullockii* :

All trees:

Char. 136: 1 --> 0  
Char. 137: 0 --> 1  
Char. 167: 0 --> 1

*Glyptops plicatulus* :

All trees:

No autapomorphies:

*Dinochelys whitei* :

All trees:

Char. 159: 1 --> 0  
Char. 179: 0 --> 1

*Neurankylus eximius* :

All trees:

Char. 143: 0 --> 1

*Trinitichelys hiatti* :

All trees:

No autapomorphies:

*Plesiobaena antiqua* :

All trees:

Char. 183: 1 --> 0

Char. 187: 0 --> 1

*Boremys pulchra* :

Some trees:

Char. 207: 2 --> 1

*Baena arenosa* :

All trees:

Char. 18: 1 --> 0

Char. 37: 1 --> 0

Char. 101: 1 --> 0

Char. 127: 0 --> 1

Char. 160: 0 --> 1

Some trees:

Char. 136: 1 --> 0

*Chisternon undatum* :

All trees:

Char. 183: 1 --> 0

Char. 187: 0 --> 1

*Portlandemys macdowellii* :

All trees:

Char. 67: 0 --> 1

*Plesiochelys etalloni* :

All trees:

Char. 63: 0 --> 1

*Solnhofia parsonsi* :

All trees:

Char. 38: 0 --> 1

Char. 69: 2 --> 1

Char. 136: 0 --> 2

*Thalassemys moseri* :

All trees:

Char. 6: 0 --> 1

Char. 15: 0 --> 1

Char. 71: 1 --> 0

Char. 157: 0 --> 1

Some trees:

Char. 11: 1 --> 0

*Santanachelys gaffneyi* :

All trees:

Char. 18: 1 --> 0  
Char. 134: 0 --> 1  
Char. 159: 0 --> 1  
Char. 200: 1 --> 0

Some trees:

Char. 67: 1 --> 0

*Chengyunchelys* :

All trees:

Char. 137: 0 --> 2  
Char. 143: 0 --> 1  
Char. 170: 1 --> 0  
Char. 178: 0 --> 1

*Xinjiangchelys latimarginalis* :

All trees:

Char. 143: 0 --> 1  
Char. 178: 0 --> 1  
Char. 214: 2 --> 1

Some trees:

Char. 83: 0 --> 1

*Hangaiemys hoburensis* :

All trees:

Char. 64: 0 --> 1  
Char. 85: 1 --> 2

Some trees:

Char. 11: 1 --> 0  
Char. 96: 1 --> 0  
Char. 98: 2 --> 1  
Char. 101: 1 --> 0  
Char. 154: 1 --> 0  
Char. 184: 1 --> 0

*Judithemys sukhanovi* :

Some trees:

Char. 75: 1 --> 0  
Char. 199: 0 --> 1

*Dracochelys bicuspis* :

All trees:

Char. 39: 0 --> 1  
Char. 189: 1 --> 0

*Ordosemys leios* :

All trees:

Char. 58: 2 --> 1  
Char. 191: 0 --> 1

*Toxochelys latiremys* :

All trees:

Char. 178: 0 --> 1

*Caretta caretta* :

All trees:

Char. 54: 0 --> 1

Char. 130: 1 --> 0

*Chelonia mydas* :

All trees:

Char. 35: 0 --> 1

Char. 39: 01 --> 2

Char. 199: 0 --> 1

*Mesodermochelys undulatus* :

All trees:

Char. 185: 1 --> 0

*Dermochelys coriacea* :

All trees:

Char. 120: 1 --> 2

Char. 130: 1 --> 3

*Macrolemys schmidti* :

All trees:

Char. 52: 2 --> 4

*Macrolemys temminckii* :

Some trees:

Char. 139: 2 --> 1

Char. 206: 1 --> 2

Char. 224: 1 --> 0

*Protochelydra zangerli* :

All trees:

No autapomorphies:

*Chelydra serpentina* :

Some trees:

Char. 136: 0 --> 2

*Platysternon megacephalum* :

All trees:

Char. 18: 1 --> 0

Char. 22: 0 --> 1

Char. 35: 0 --> 1

Char. 82: 0 --> 1

Char. 162: 1 --> 2

Char. 163: 0 --> 1

Char. 191: 0 --> 1

Char. 240: 3 --> 2

Some trees:

Char. 184: 1 --> 0

*Mongolemys elegans* :

All trees:

Char. 24: 1 --> 0  
Char. 65: 1 --> 0  
Char. 75: 1 --> 0  
Char. 96: 1 --> 0  
Char. 98: 2 --> 1  
Char. 180: 1 --> 0  
Char. 208: 1 --> 0

*Gopherus polyphemus* :

All trees:

Char. 216: 1 --> 0

*Eurotestudo hermanni* :

All trees:

Char. 161: 1 --> 0

Some trees:

Char. 77: 0 --> 1

*Chelonoidis gringorum* :

All trees:

Char. 139: 2 --> 0

*Chelonoidis chilensis* :

All trees:

Char. 142: 1 --> 0

*Stylemys nebraskensis* :

All trees:

Char. 161: 1 --> 2  
Char. 221: 0 --> 1  
Char. 224: 1 --> 0

*Chrysemys picta* :

All trees:

Char. 61: 1 --> 0

Some trees:

Char. 176: 0 --> 1

*Trachemys scripta* :

All trees:

Char. 11: 1 --> 0  
Char. 40: 0 --> 1  
Char. 135: 0 --> 1

*Emys orbicularis* :

All trees:

Char. 61: 1 --> 0  
Char. 146: 0 --> 1  
Char. 150: 1 --> 0

*Geoclemys hamiltonii* :

All trees:

Char. 121: 0 --> 1

Char. 156: 1 --> 0

Some trees:

Char. 20: 0 --> 1

Char. 45: 0 --> 1

Char. 46: 0 --> 1

Char. 131: 0 --> 1

Char. 176: 0 --> 1

*Echmatemys wyomingensis* :

All trees:

Char. 159: 1 --> 0

*Emarginachelys cretacea* :

All trees:

No autapomorphies:

*Baptemys wyomingensis* :

All trees:

Char. 161: 0 --> 1

*Dermatemys mawii* :

All trees:

Char. 121: 1 --> 0

Char. 133: 0 --> 1

Char. 163: 0 --> 1

Char. 172: 0 --> 1

Char. 174: 1 --> 0

Char. 189: 1 --> 0

*Xenochelys formosa* :

All trees:

Char. 63: 0 --> 2

Char. 127: 0 --> 1

Char. 163: 0 --> 1

*Staurotypus triporcatus* :

All trees:

Char. 121: 1 --> 2

Some trees:

Char. 20: 0 --> 1

Char. 154: 0 --> 1

Char. 222: 1 --> 0

*Sternotherus odoratus* :

All trees:

No autapomorphies:

*Kinosternon flavescens* :

All trees:

Char. 131: 1 --> 0

Char. 147: 0 --> 1

Char. 224: 0 --> 1

*Basilemys variolosa* :

All trees:

Char. 171: 0 --> 1

Char. 180: 0 --> 1

*Yehguia tatsuensis* :

All trees:

Char. 174: 1 --> 0

*Adocus beatus* :

All trees:

Char. 176: 0 --> 1

*Hoplochelys crassa* :

All trees:

Char. 121: 1 --> 2

Char. 156: 1 --> 0

Char. 159: 2 --> 0

*Apalone spinifera* :

All trees:

Char. 39: 0 --> 1

Some trees:

Char. 229: 1 --> 0

*Plastomenus* aff. *thomassii* :

Some trees:

Char. 92: 1 --> 0

Char. 145: 1 --> 0

*Pelodiscus sinensis* :

All trees:

Char. 65: 1 --> 0

*Lissemys punctata* :

All trees:

Char. 158: 0 --> 1

Some trees:

Char. 66: 2 --> 0

Char. 92: 1 --> 0

Char. 93: 1 --> 0

*Shachemys laosiana* :

All trees:

Char. 77: 0 --> 1

Char. 133: 01 --> 2

Char. 137: 0 --> 1

Char. 141: 1 --> 0

*Anosteira ornata* :

All trees:

No autapomorphies:

*Carettochelys insculpta* :

All trees:

Char. 22: 0 --> 1

Some trees:

Char. 218: 0 --> 1

Node 103 :

All trees:

No synapomorphies

Node 104 :

All trees:

Char. 58: 2 --> 0

Node 105 :

All trees:

Char. 30: 1 --> 0

Char. 57: 1 --> 0

Char. 118: 0 --> 1

Node 106 :

All trees:

Char. 213: 0 --> 1

Char. 231: 1 --> 0

Node 107 :

All trees:

Char. 117: 0 --> 1

Char. 122: 0 --> 1

Node 108 :

All trees:

Char. 225: 0 --> 1

Node 109 :

All trees:

Char. 19: 0 --> 1

Char. 43: 0 --> 1

Char. 48: 0 --> 1

Char. 49: 0 --> 1

Char. 58: 0 --> 1

Char. 78: 0 --> 1

Char. 80: 0 --> 1

Some trees:

Char. 57: 0 --> 1

Node 110 :

All trees:

Char. 14: 0 --> 1

Char. 79: 0 --> 1



Node 111 :

All trees:

Char. 139: 1 --> 2

Char. 170: 0 --> 1

Some trees:

Char. 131: 0 --> 1

Char. 144: 0 --> 1

Char. 214: 0 --> 1

Node 112 :

All trees:

Char. 149: 0 --> 1

Some trees:

Char. 81: 1 --> 2

Char. 91: 0 --> 1

Node 113 :

All trees:

Char. 58: 1 --> 2

Node 114 :

All trees:

Char. 142: 0 --> 1

Char. 159: 0 --> 1

Node 115 : *CHENGYUNCHELYS* CROWNWARDS

All trees:

Char. 123: 0 --> 1

Char. 141: 0 --> 1

Some trees:

Char. 145: 1 --> 0

Node 116 : *SIAMOCHELYS* CROWNWARDS

All trees:

Char. 53: 0 --> 1

Char. 85: 0 --> 2

Some trees:

Char. 83: 1 --> 0

Node 117 :

All trees:

Char. 23: 0 --> 1

Char. 26: 01 --> 2

Char. 51: 2 --> 0

Char. 59: 2 --> 1

Char. 97: 0 --> 1

Char. 98: 1 --> 0

Char. 99: 0 --> 1

Char. 204: 1 --> 0

Char. 209: 0 --> 1

Node 118 :

All trees:

Char. 48: 1 --> 2  
Char. 52: 1 --> 3  
Char. 61: 0 --> 1  
Char. 69: 0 --> 1  
Char. 220: 1 --> 0

Node 119 :

All trees:

Char. 25: 0 --> 1  
Char. 45: 0 --> 1  
Char. 46: 0 --> 1

Node 120 :

All trees:

Char. 6: 1 --> 0  
Char. 9: 1 --> 0  
Char. 69: 2 --> 0  
Char. 71: 0 --> 1

Some trees:

Char. 66: 12 --> 0

Node 121 :

All trees:

Char. 39: 1 --> 2  
Char. 102: 0 --> 1  
Char. 116: 0 --> 1

Node 122 :

All trees:

Char. 104: 0 --> 1

Node 123 :

All trees:

Char. 86: 0 --> 1

Node 124 :

All trees:

Char. 200: 0 --> 1

Node 125 :

All trees:

Char. 183: 1 --> 0

Node 126 :

All trees:

Char. 162: 0 --> 1  
Char. 227: 1 --> 0

Node 127 :

All trees:

Char. 129: 1 --> 0  
Char. 141: 1 --> 0  
Char. 142: 1 --> 0

Char. 145: 0 --> 1  
Char. 160: 2 --> 1

Node 128 : TESTUDINES

All trees:

Char. 136: 1 --> 0  
Char. 200: 01 --> 2

Node 129 : *PLESIOCHELYS* CROWNWARD

All trees:

Char. 3: 0 --> 1  
Char. 6: 1 --> 0  
Char. 71: 0 --> 1  
Char. 123: 1 --> 0  
Char. 160: 0 --> 2

Some trees:

Char. 101: 1 --> 0

Node 130 :

All trees:

Char. 18: 0 --> 1  
Char. 75: 0 --> 1  
Char. 85: 2 --> 1

Node 131 :

All trees:

Char. 37: 0 --> 1  
Char. 96: 0 --> 1  
Char. 97: 0 --> 1  
Char. 98: 1 --> 2

Node 132 :

All trees:

Char. 144: 1 --> 0  
Char. 161: 0 --> 1

Node 133 :

All trees:

Char. 144: 0 --> 1  
Char. 160: 2 --> 1

Node 134 :

All trees:

Char. 198: 0 --> 1

Node 135 :

All trees:

Char. 71: 1 --> 0  
Char. 74: 0 --> 1  
Char. 94: 0 --> 2  
Char. 119: 0 --> 1

Some trees:

Char. 137: 1 --> 0

Node 136 :

All trees:

Char. 3: 1 --> 0

Char. 6: 0 --> 1

Char. 21: 0 --> 1

Char. 36: 0 --> 1

Some trees:

Char. 11: 1 --> 0

Char. 101: 0 --> 1

Node 137 : CROWN PLEURODIRA

All trees:

Char. 127: 0 --> 1

Char. 133: 0 --> 1

Some trees:

Char. 90: 0 --> 1

Char. 183: 1 --> 0

Node 138 :

All trees:

Char. 18: 12 --> 0

Char. 132: 0 --> 1

Char. 133: 1 --> 2

Char. 159: 1 --> 0

Node 139 :

All trees:

Char. 10: 0 --> 1

Char. 11: 0 --> 1

Char. 55: 0 --> 1

Char. 123: 0 --> 1

Char. 132: 0 --> 1

Char. 161: 1 --> 0

Char. 217: 0 --> 1

Node 140 :

All trees:

Char. 129: 1 --> 0

Char. 162: 0 --> 1

Node 141 :

All trees:

Char. 0: 0 --> 1

Char. 42: 0 --> 1

Char. 50: 0 --> 1

Node 142 :

All trees:

Char. 18: 12 --> 0

Char. 68: 0 --> 1

Char. 174: 0 --> 1

Node 143 :

All trees:

Char. 39: 0 --> 2

Char. 160: 2 --> 1

Node 144 :

All trees:

Char. 1: 0 --> 1

Char. 64: 0 --> 1

Char. 141: 1 --> 0

Char. 143: 0 --> 1

Char. 183: 1 --> 0

Node 145 :

All trees:

Char. 35: 0 --> 1

Node 146 :

All trees:

Char. 56: 1 --> 2

Char. 80: 1 --> 2

Node 147 :

All trees:

Char. 6: 1 --> 2

Char. 171: 0 --> 1

Node 148 :

All trees:

Char. 76: 0 --> 1

Char. 169: 0 --> 2

Node 149 :

All trees:

Char. 137: 0 --> 2

Char. 138: 0 --> 1

Some trees:

Char. 39: 0 --> 1

Node 150 :

All trees:

Char. 13: 1 --> 0

Char. 15: 0 --> 1

Char. 39: 0 --> 1

Node 151 :

All trees:

Char. 42: 0 --> 1

Char. 141: 1 --> 0

Some trees:

Char. 145: 0 --> 1

Node 152 :

All trees:

Char. 3: 1 --> 0

Char. 39: 0 --> 1

Char. 63: 0 --> 1

Node 153 :

All trees:

Char. 28: 0 --> 1

Char. 125: 1 --> 2

Char. 134: 0 --> 1

Char. 164: 0 --> 1

Char. 238: 0 --> 1

Some trees:

Char. 145: 0 --> 1

Node 154 : CROWN CRYPTODIRA

All trees:

Char. 0: 0 --> 1

Char. 159: 0 --> 2

Char. 162: 0 --> 1

Node 155 :

All trees:

Char. 33: 0 --> 1

Char. 38: 0 --> 1

Char. 44: 0 --> 1

Char. 76: 0 --> 1

Char. 203: 0 --> 1

Some trees:

Char. 101: 1 --> 0

Node 156 :

All trees:

Char. 11: 1 --> 0

Char. 18: 1 --> 0

Char. 51: 2 --> 1

Char. 63: 0 --> 2

Char. 66: 2 --> 0

Char. 69: 2 --> 1

Char. 82: 0 --> 1

Char. 208: 0 --> 1

Node 157 :

All trees:

Char. 120: 0 --> 1

Char. 165: 0 --> 1

Char. 196: 1 --> 0

Char. 222: 0 --> 1

Node 158 :

All trees:

Char. 35: 0 --> 1

Some trees:

Char. 145: 0 --> 1

Node 159 :

All trees:

Char. 177: 0 --> 1

Char. 178: 0 --> 1

Node 160 :

All trees:

Char. 18: 1 --> 2

Char. 136: 1 --> 0

Char. 174: 0 --> 1

Char. 199: 0 --> 1

Node 161 :

All trees:

Char. 9: 1 --> 0

Char. 65: 0 --> 1

Char. 92: 1 --> 0

Char. 193: 0 --> 1

Char. 197: 0 --> 1

Char. 203: 0 --> 1

Node 162 :

All trees:

Char. 66: 2 --> 0

Some trees:

Char. 77: 1 --> 0

Node 163 :

All trees:

Char. 162: 1 --> 0

Char. 174: 1 --> 0

Some trees:

Char. 9: 0 --> 1

Char. 39: 0 --> 2

Node 164 :

All trees:

Char. 144: 1 --> 0

Char. 157: 0 --> 1

Char. 161: 0 --> 1

Char. 163: 0 --> 1

Node 165 :

All trees:

Char. 77: 0 --> 1

Char. 127: 0 --> 1

Char. 159: 2 --> 1

Char. 191: 0 --> 1

Char. 240: 3 --> 0

Node 166 :

All trees:

Char. 24: 0 --> 1  
Char. 37: 1 --> 0  
Char. 207: 2 --> 1  
Char. 208: 0 --> 1  
Char. 219: 0 --> 1  
Char. 222: 0 --> 1

Node 167 :

All trees:

Char. 135: 0 --> 1  
Char. 156: 1 --> 0  
Char. 159: 1 --> 0  
Char. 237: 0 --> 1

Node 168 :

All trees:

Char. 232: 1 --> 0

Some trees:

Char. 176: 0 --> 1

Node 169 :

All trees:

Char. 137: 0 --> 1

Node 170 :

All trees:

Char. 192: 0 --> 1

Node 171 :

All trees:

Char. 121: 0 --> 1

Node 172 :

All trees:

Char. 9: 0 --> 1  
Char. 47: 0 --> 1  
Char. 229: 0 --> 1

Node 173 :

All trees:

Char. 39: 0 --> 2  
Char. 89: 1 --> 2  
Char. 157: 0 --> 1  
Char. 159: 2 --> 1

Node 174 :

All trees:

Char. 89: 0 --> 1  
Char. 144: 1 --> 0

Node 175 :

All trees:



Char. 130: 1 --> 2  
Char. 133: 0 --> 1  
Char. 177: 1 --> 2  
Char. 180: 0 --> 1  
Some trees:  
Char. 201: 0 --> 1

Node 176 :  
All trees:  
Char. 177: 0 --> 1

Node 177 :  
All trees:  
Char. 132: 0 --> 1  
Char. 153: 0 --> 1  
Char. 172: 0 --> 1  
Char. 173: 0 --> 1

Node 178 :  
All trees:  
Char. 123: 0 --> 1

Node 179 :  
All trees:  
Char. 128: 0 --> 1  
Char. 143: 0 --> 1  
Char. 144: 1 --> 0  
Char. 166: 0 --> 1

Node 180 :  
All trees:  
Char. 127: 0 --> 1  
Char. 159: 2 --> 0

Node 181 :  
All trees:  
Char. 27: 0 --> 1  
Char. 73: 0 --> 1  
Char. 94: 0 --> 1  
Char. 189: 1 --> 0  
Some trees:  
Char. 92: 0 --> 1

Node 182 :  
All trees:  
Char. 20: 0 --> 1  
Char. 120: 1 --> 2  
Char. 130: 2 --> 3  
Some trees:  
Char. 34: 0 --> 1  
Char. 36: 0 --> 1  
Char. 145: 0 --> 1  
Char. 152: 0 --> 1

Char. 188: 1 --> 2  
Char. 217: 0 --> 1  
Char. 234: 2 --> 1  
Char. 239: 0 --> 1

Node 183 :

All trees:

Char. 5: 0 --> 1  
Char. 32: 0 --> 1  
Char. 33: 0 --> 2  
Char. 42: 0 --> 1  
Char. 44: 0 --> 1  
Char. 64: 0 --> 1  
Char. 69: 2 --> 1  
Char. 120: 0 --> 1  
Char. 123: 0 --> 1  
Char. 130: 1 --> 2  
Char. 154: 0 --> 1  
Char. 165: 0 --> 1  
Char. 184: 1 --> 0  
Char. 199: 1 --> 0  
Char. 222: 1 --> 0

Some trees:

Char. 66: 2 --> 0  
Char. 234: 0 --> 2

FIGURE S1. Strict consensus of 240 MPTs of length 905 steps (no taxa excluded). Numbers below clades correspond to node numbers. Numbers above clades correspond to support measures (Bremer/Bootstrap/Jackknife). Note that Bootstrap and Jackknife are GC measures, not absolute ones.

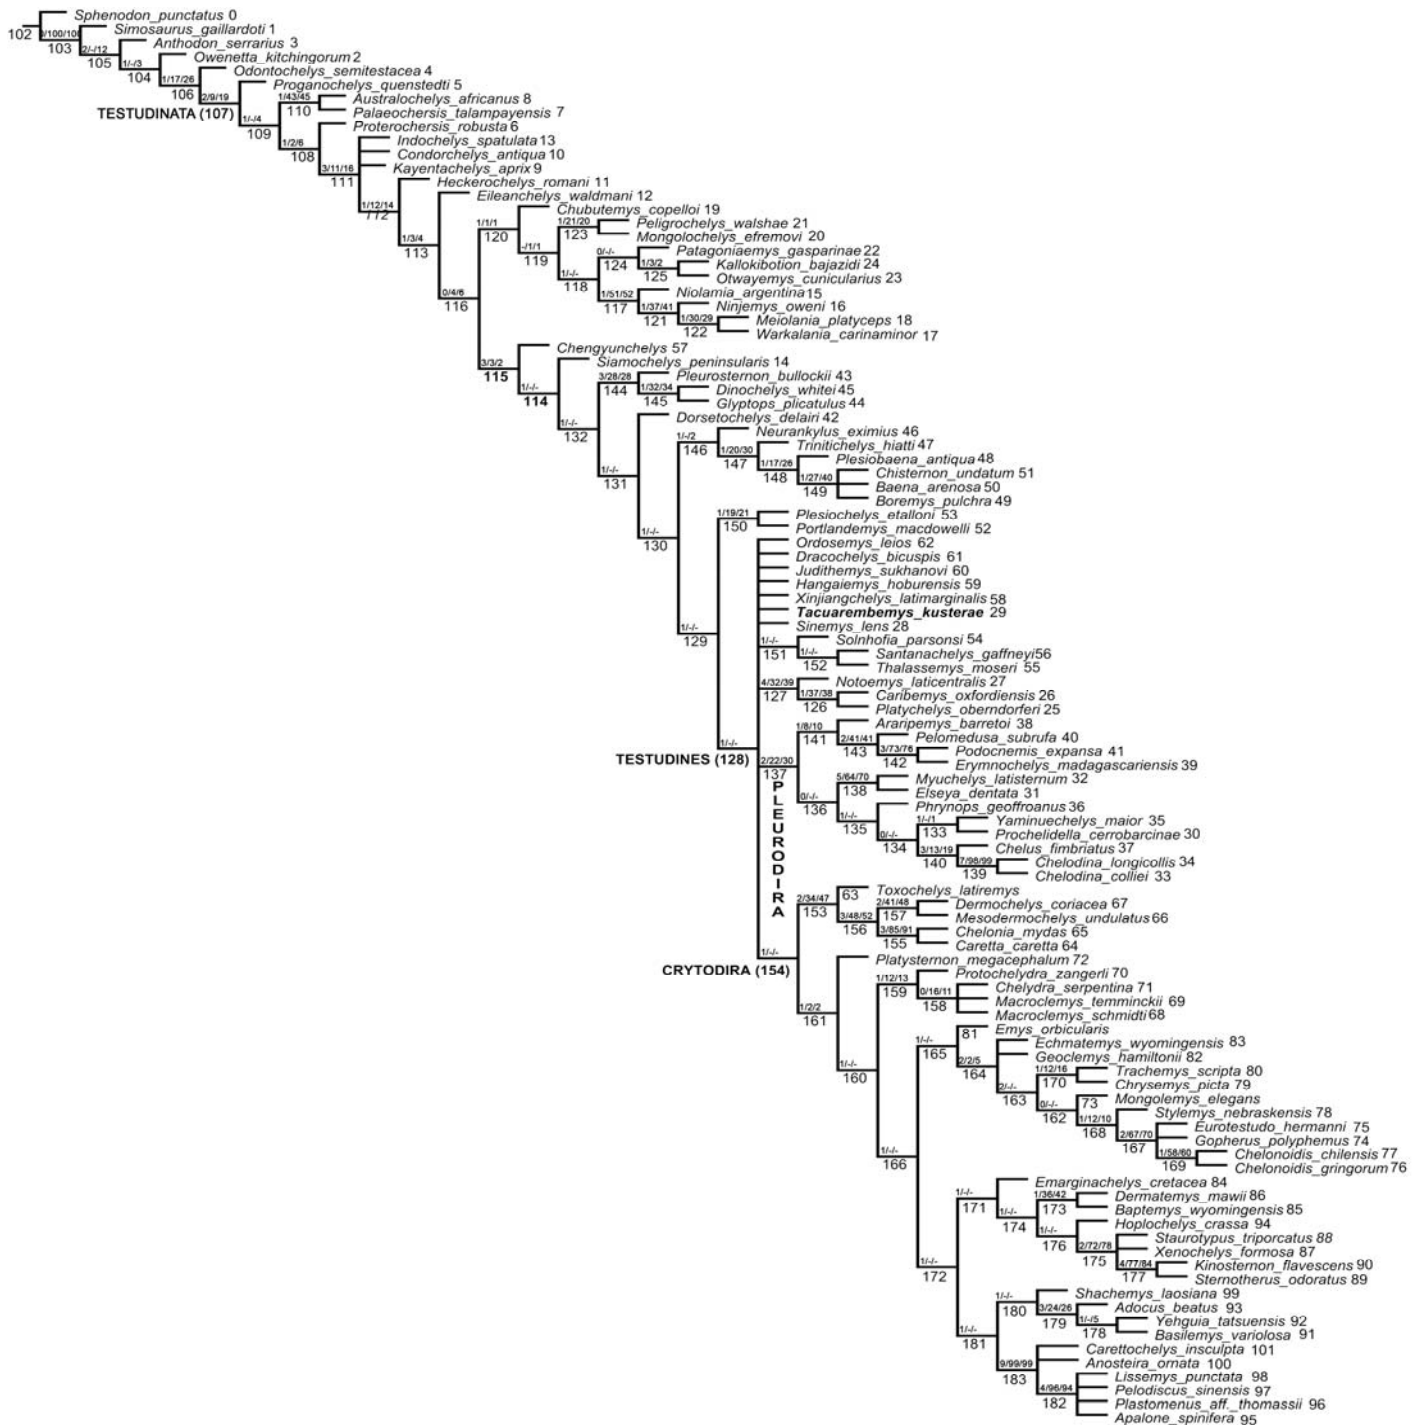

FIGURE 2S. Reduced strict consensus of 240 MPTs showing the alternative position of *Tacuarembemys kusteriae* (stars).

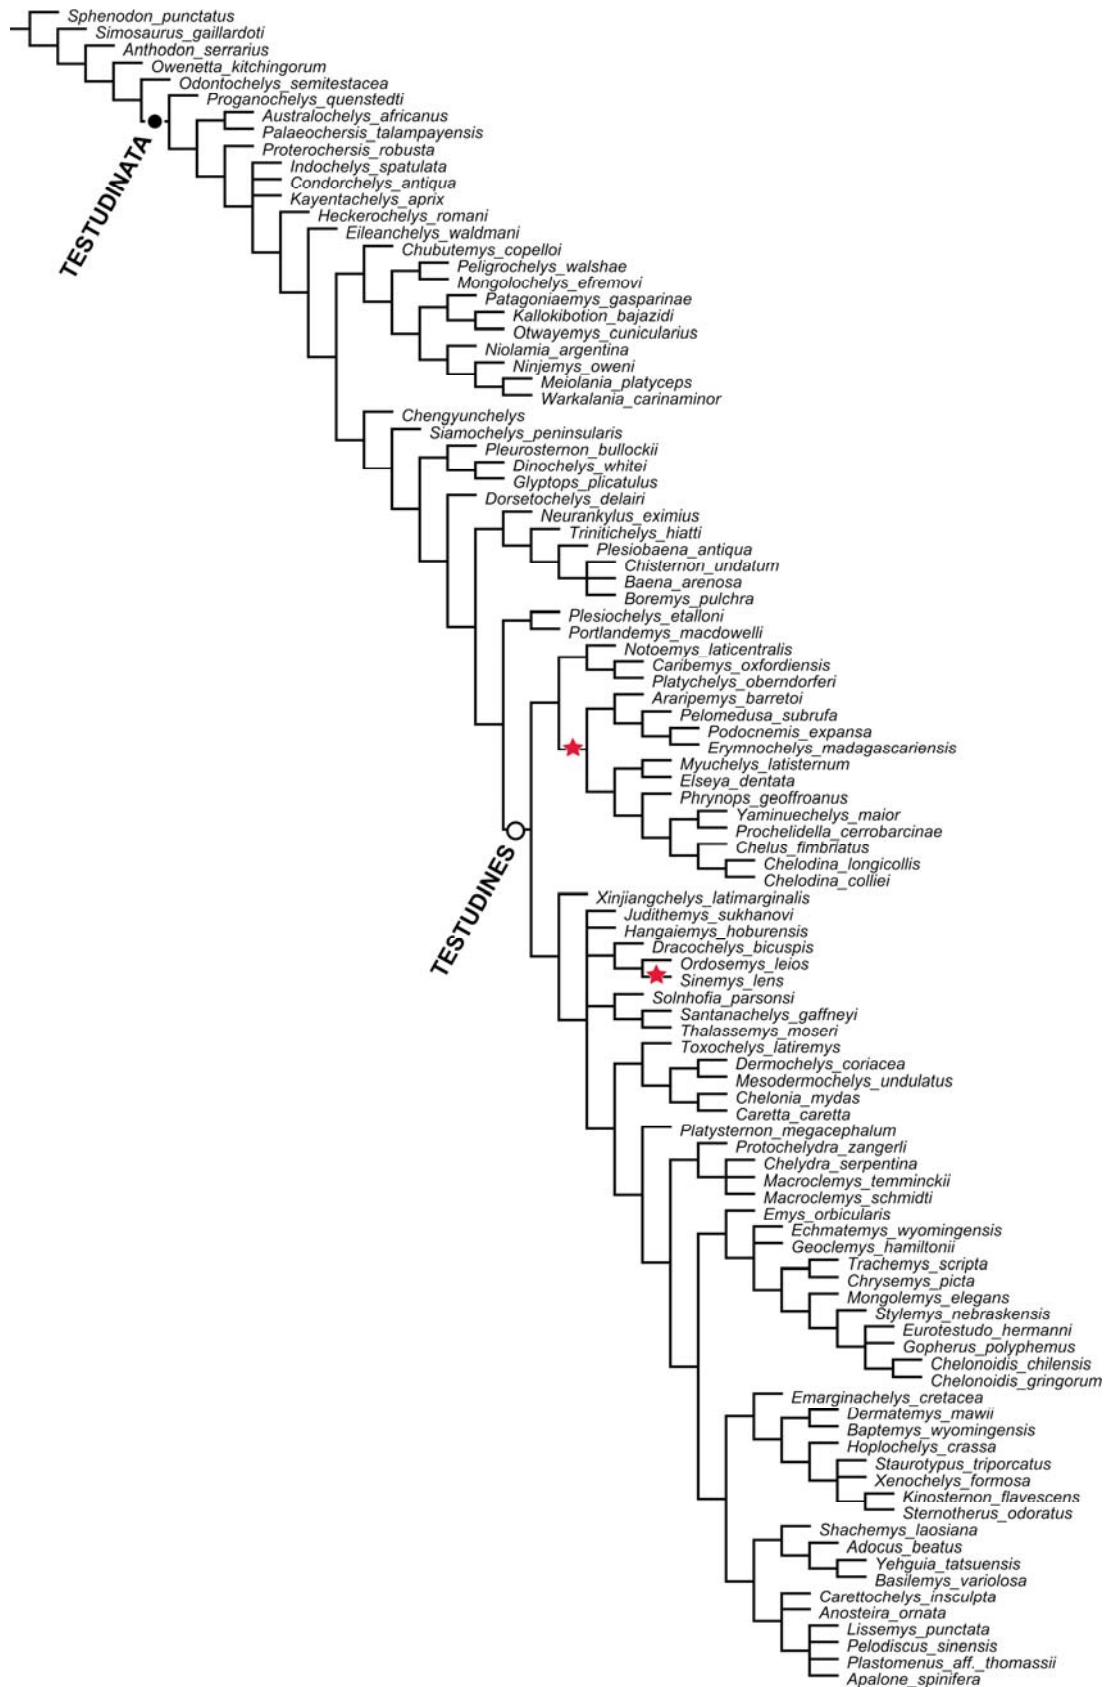

FIGURE 3S

Results of the script by Pol and Escapa (2009) run for *Tacuaembemys kusterai* dataset. The following reduced consensus is obtained after pruning the most unstable taxa (for consensus calculation, tree was collapsed).

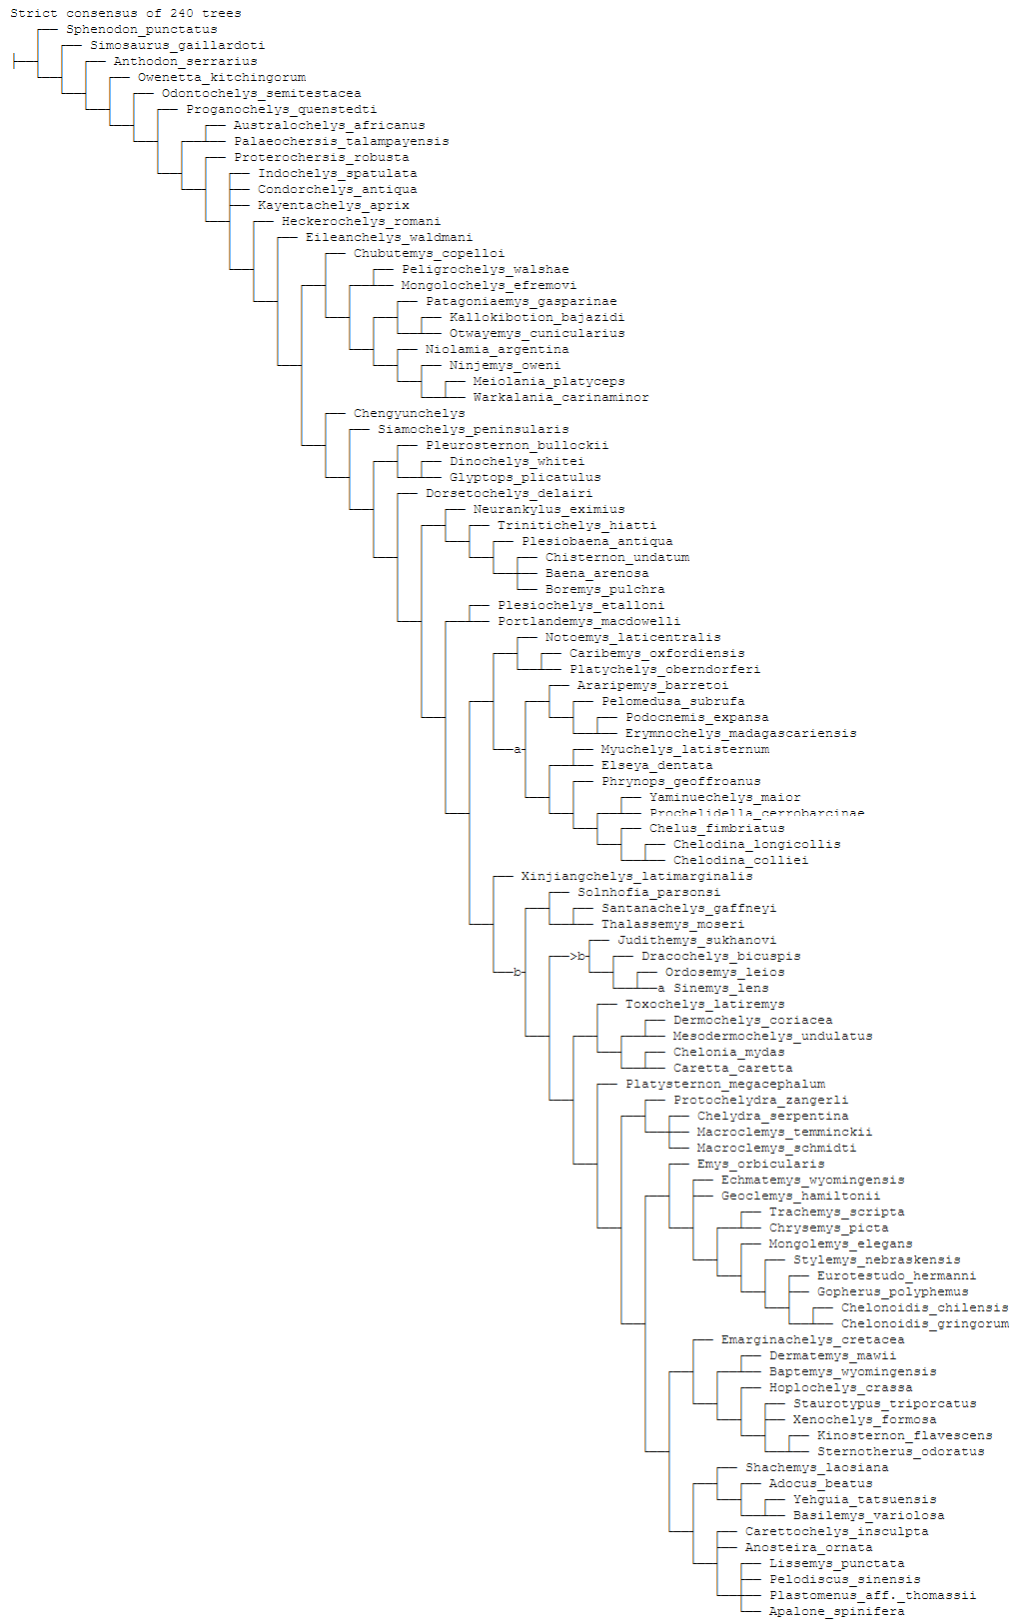

Legends:

a: Tacuarembemys (29)

b: Hangaiaemys\_hoburensis (59)

-----  
The following taxa are unstable and collapse nodes in the strict  
consensus:  
-----

Tacuarembemys

Scoring the following characters may help to resolve its position:

1 3 4 5 6 11 18 24 29 37 44 48 52 53 54 56 61 62 67 75 80 83 85 87  
90 96 98 99 101 136 144 145 154 155 157 159 161 163 167 168 178 179 182  
183 184 186 190 191 200 207 208 216 221 222 240  
-----

Hangaiaemys\_hoburensis

The following characters support alternative positions in different  
trees:

67 83 96 98 101 154 184 187

Scoring the following characters may help to resolve its position:

136 186 199 208 216 222  
-----

The following taxa form polytomies in which all descendants are  
unstable:  
-----

The following taxa form an unstable clade that appears in the reduced  
consensus [absent from the strict consensus]):

This node includes the following taxa: 11 12 14 15 16 17 18 19 20 21 22  
23 24 25 26 27 28 30 31 32 33 34 35 36 37 38 39 40 41 42 43 44 45 46 47  
48 49 50 51 52 53 54 55 56 57 58 60 61 62 63 64 65 66 67 68 69 70 71 72  
73 74 75 76 77 78 79 80 81 82 83 84 85 86 87 88 89 90 91 92 93 94 95 96  
97 98 99 100 101  
.

The following characters support alternative positions in different  
trees:

49 52 66 76 81 83 131 136 139 145 170 212 231  
-----

Indochelys\_spatulata

Scoring the following characters may help to resolve its position:

6 8 9 12 31 41 46 49 51 52 57 66 69 76 77 81 83 88 91 119 131 144  
145 150 186 206 207 212 214 231  
-----

Condorchelys\_antiqua

The following characters support alternative positions in different  
trees:

66 145

Scoring the following characters may help to resolve its position:

12 51 119  
-----

Kayentachelys\_aprix

The following characters support alternative positions in different  
trees:

66 145  
-----

Lissemys\_punctata

The following characters support alternative positions in different trees:

66 92 145

-----

*Pelodiscus\_sinensis*

Scoring the following characters may help to resolve its position:

34 93 95 216 217 229 234

-----

*Plastomenus\_aff.\_thomassii*

The following characters support alternative positions in different trees:

92 145

Scoring the following characters may help to resolve its position:

34 152 188 216 217 229 234 239

-----

*Apalone\_spinifera*

Scoring the following characters may help to resolve its position:

93

FIGURE S4. Comparison of the degree of nuchal notch development in several turtle taxa, based on the nuchal notch length/nuchal notch width ratio. See Table 2.

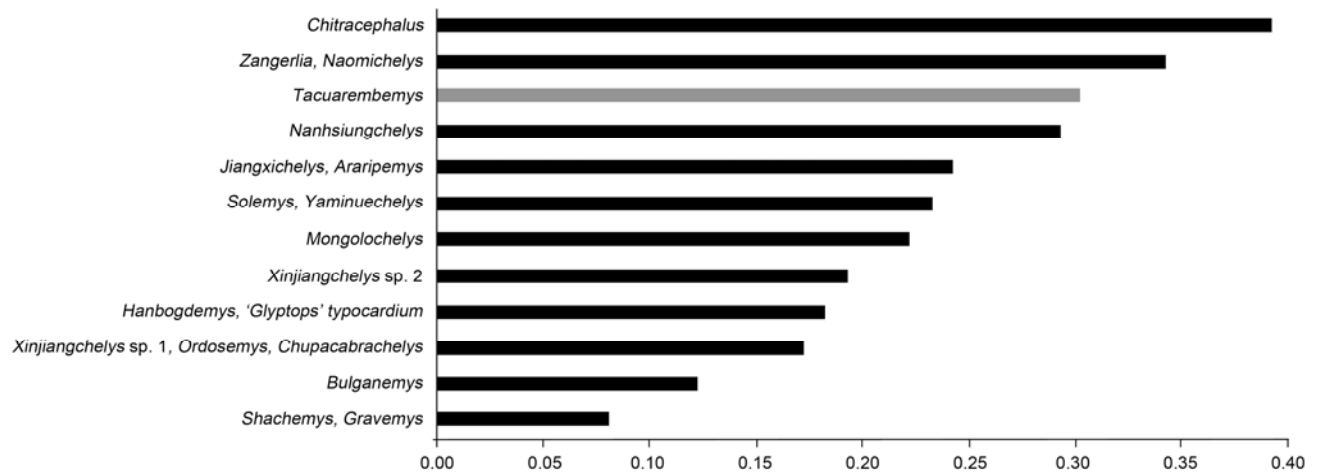



FIGURE S5. Optimization of character 123 (shell sculpturing) discussed in the text.

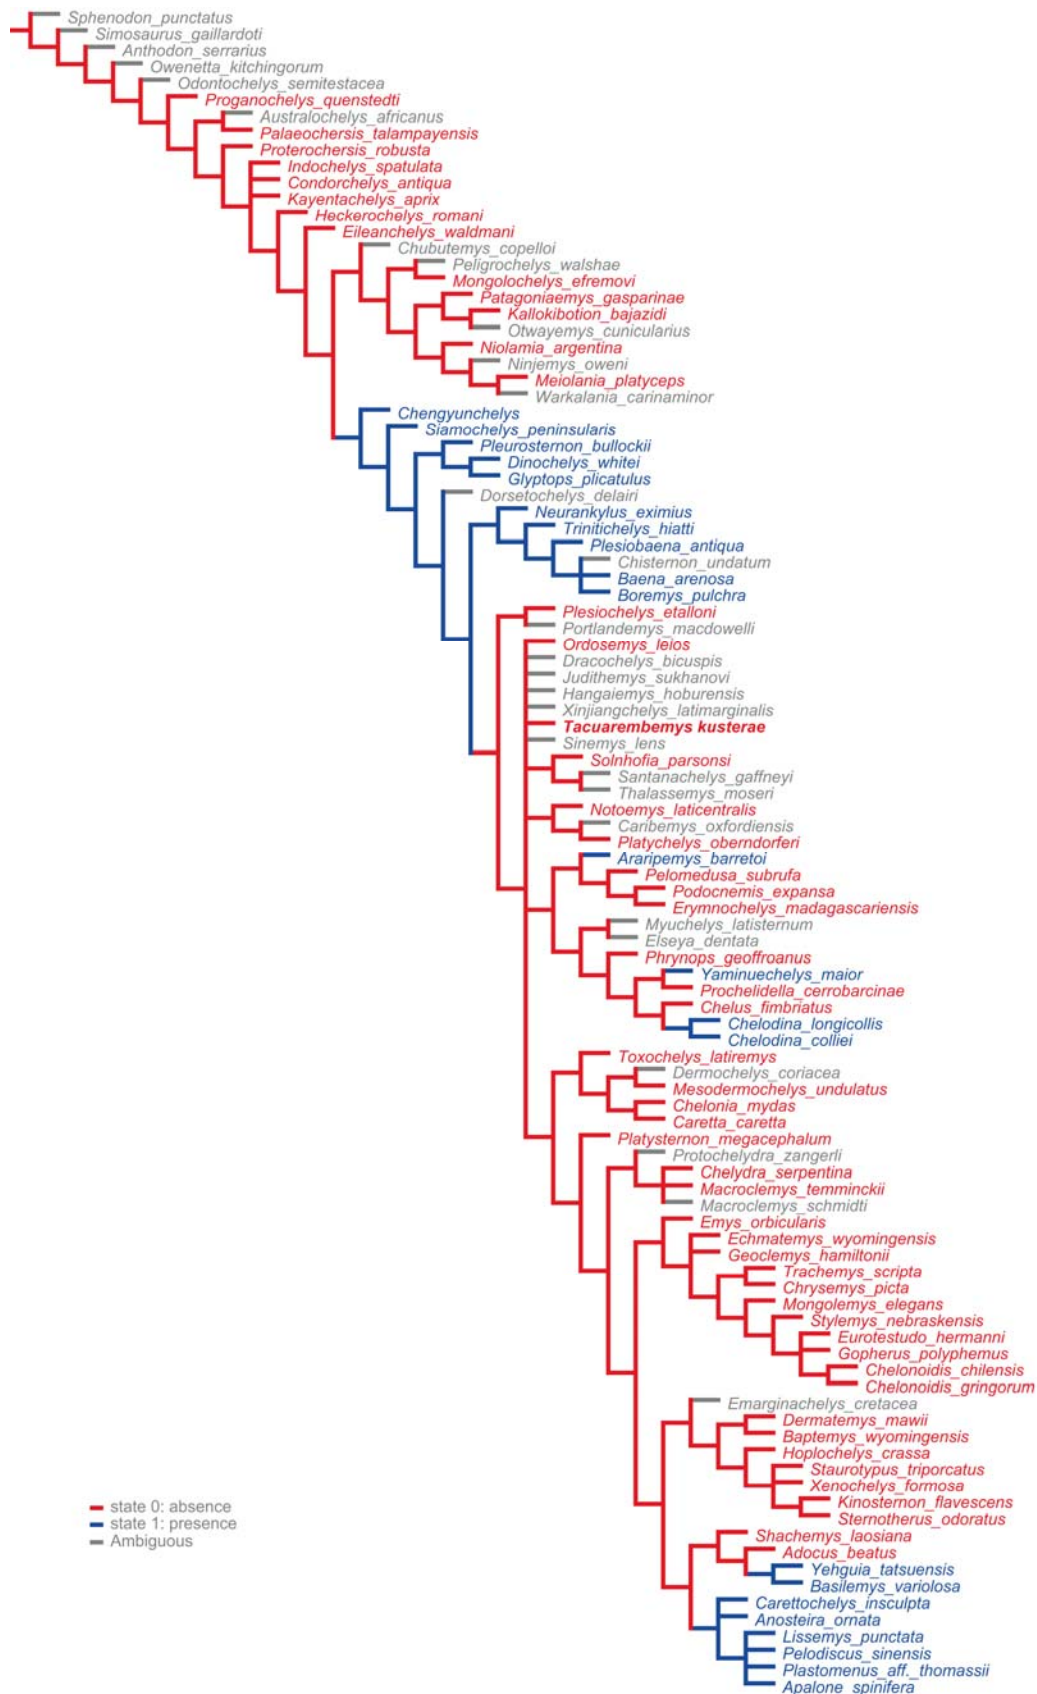

FIGURE S6. Optimization of character 137 (cervical scale) discussed in the text.

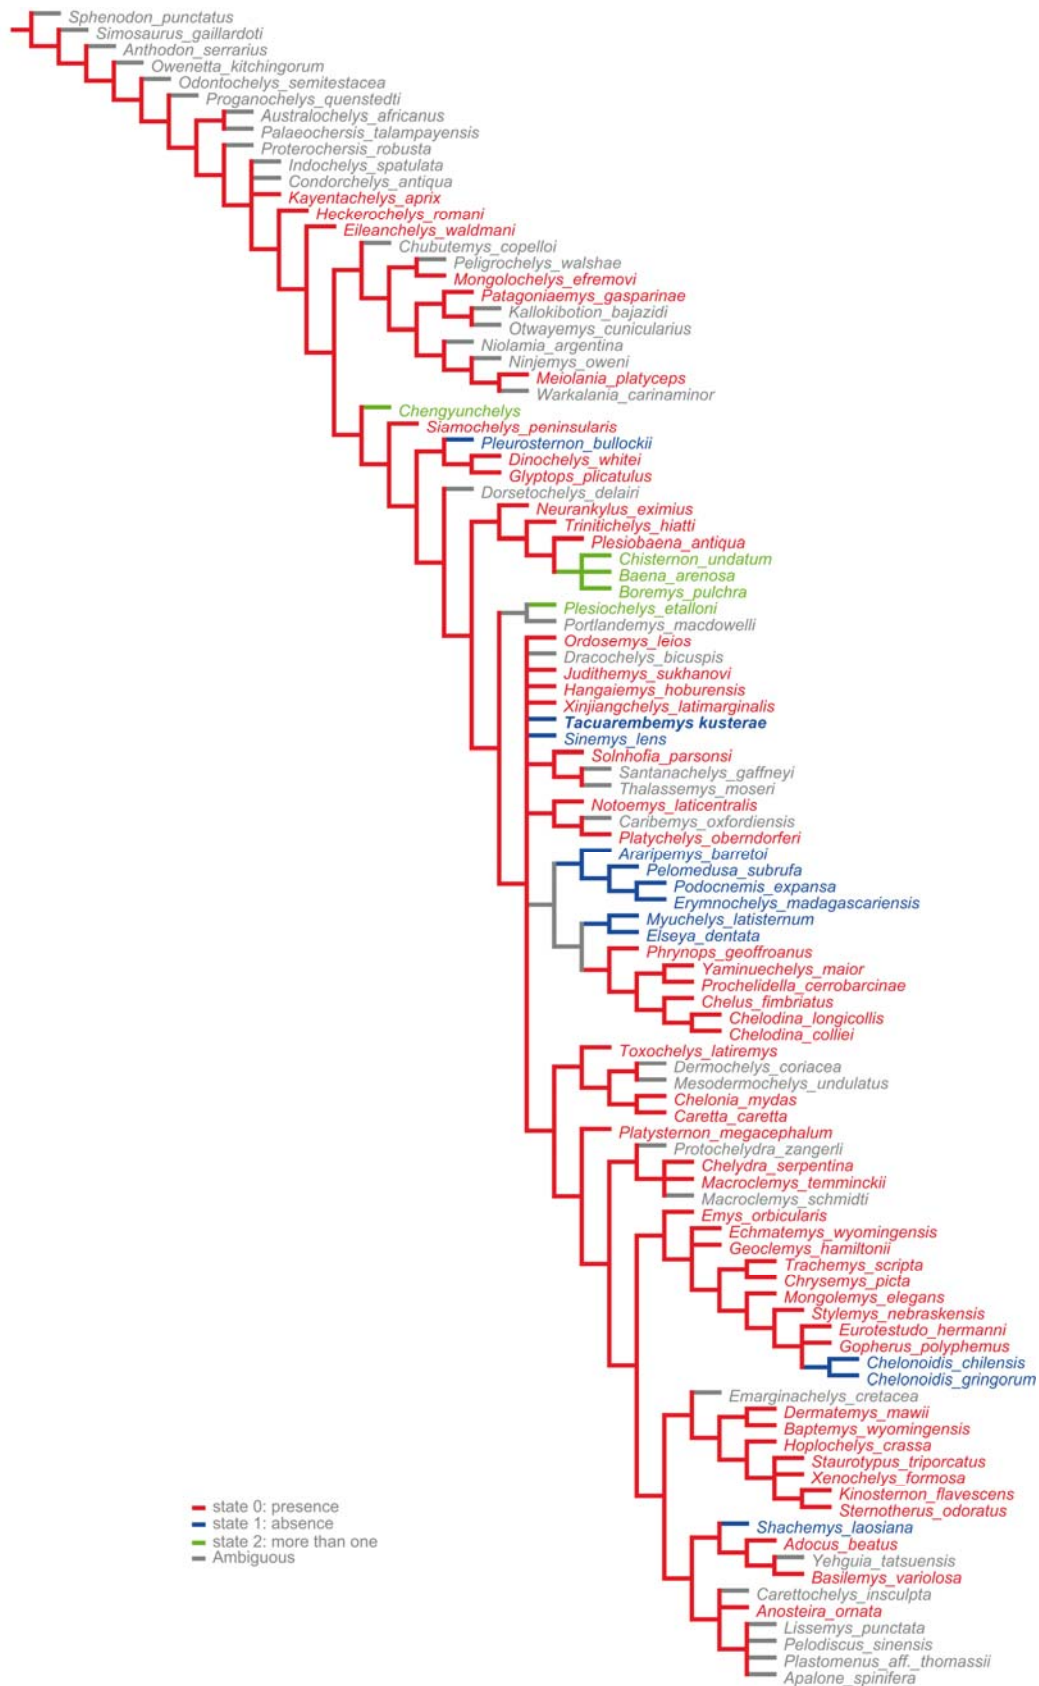

FIGURE S7. Optimization of character 138 (anterior supernumerary scales) discussed in the text.

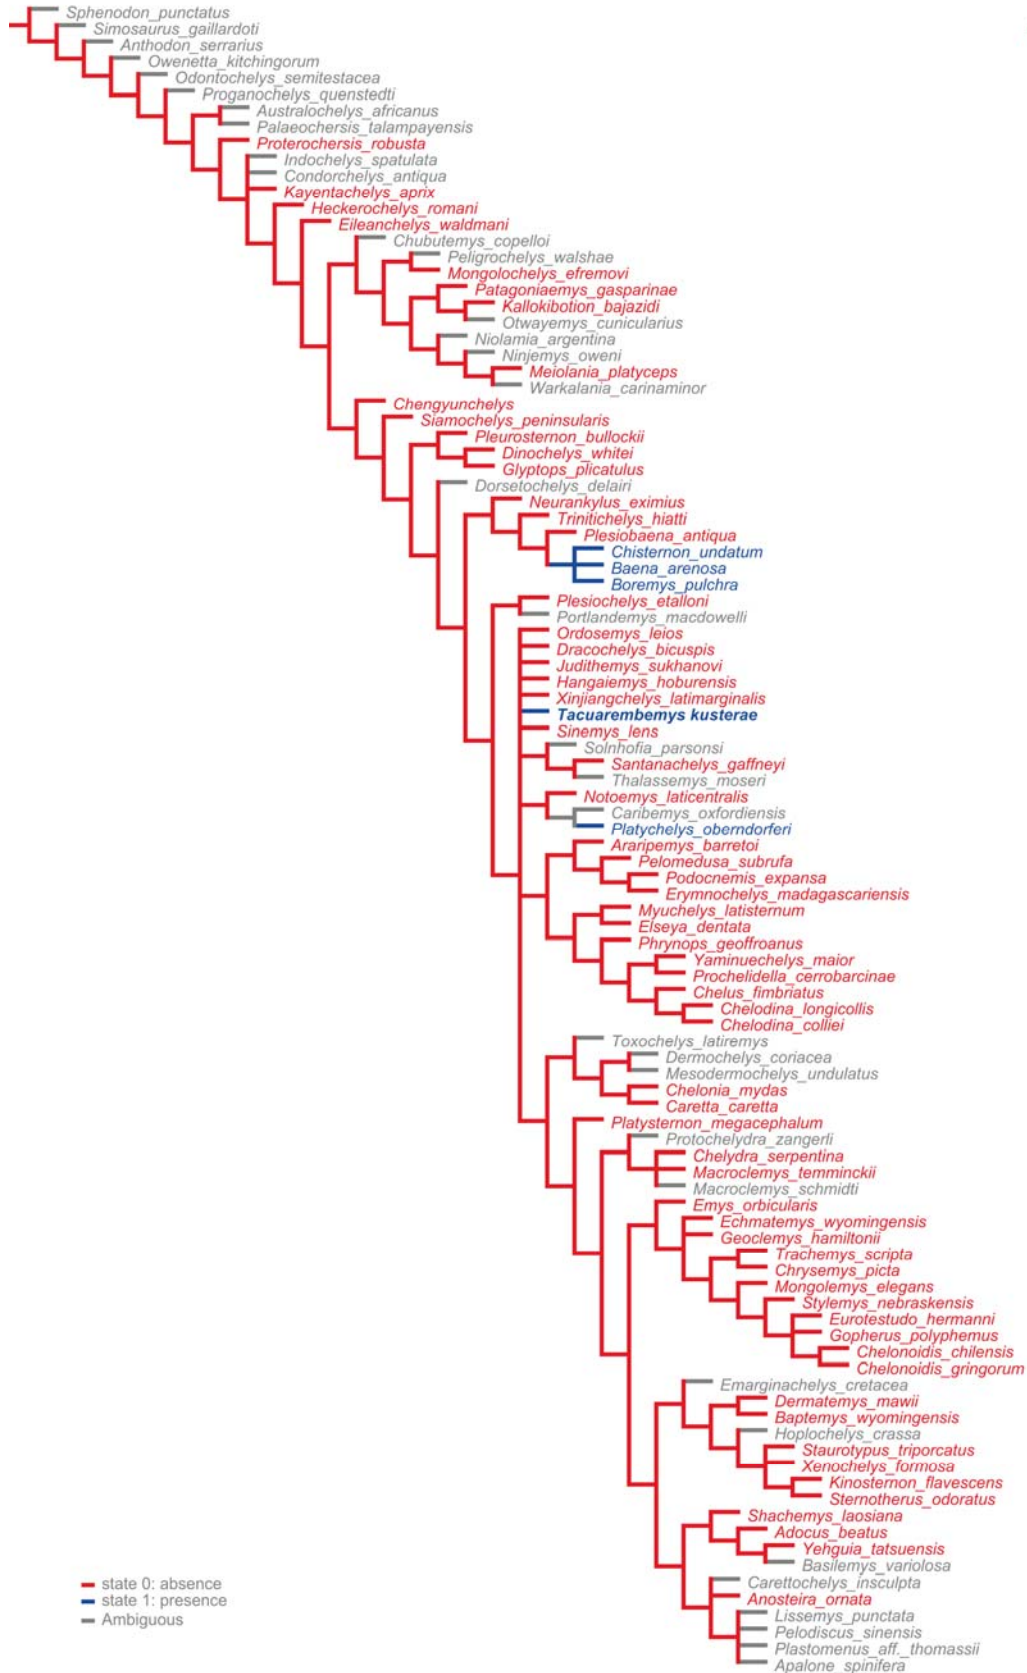

FIGURE S8. Optimization of character 141 (width of vertebrals vs. pleurals) discussed in the text.

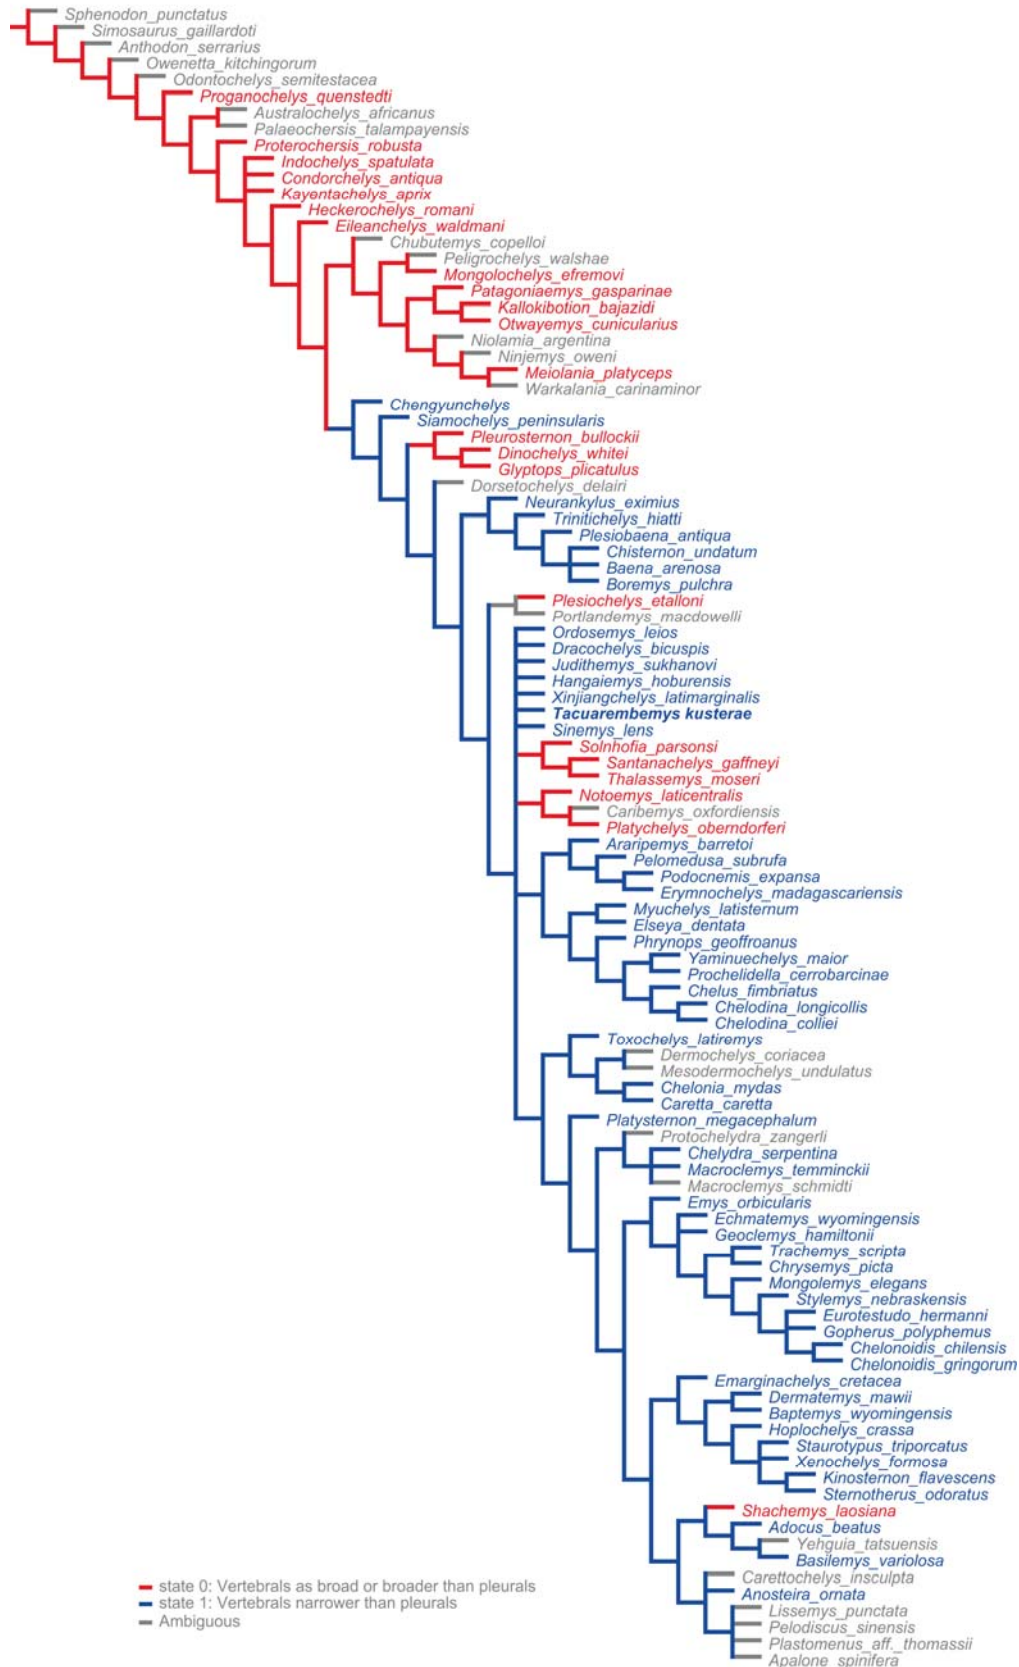



FIGURE S9. Optimization of character 142 (sulcus between vertebrae 3 and 4) discussed in the text.

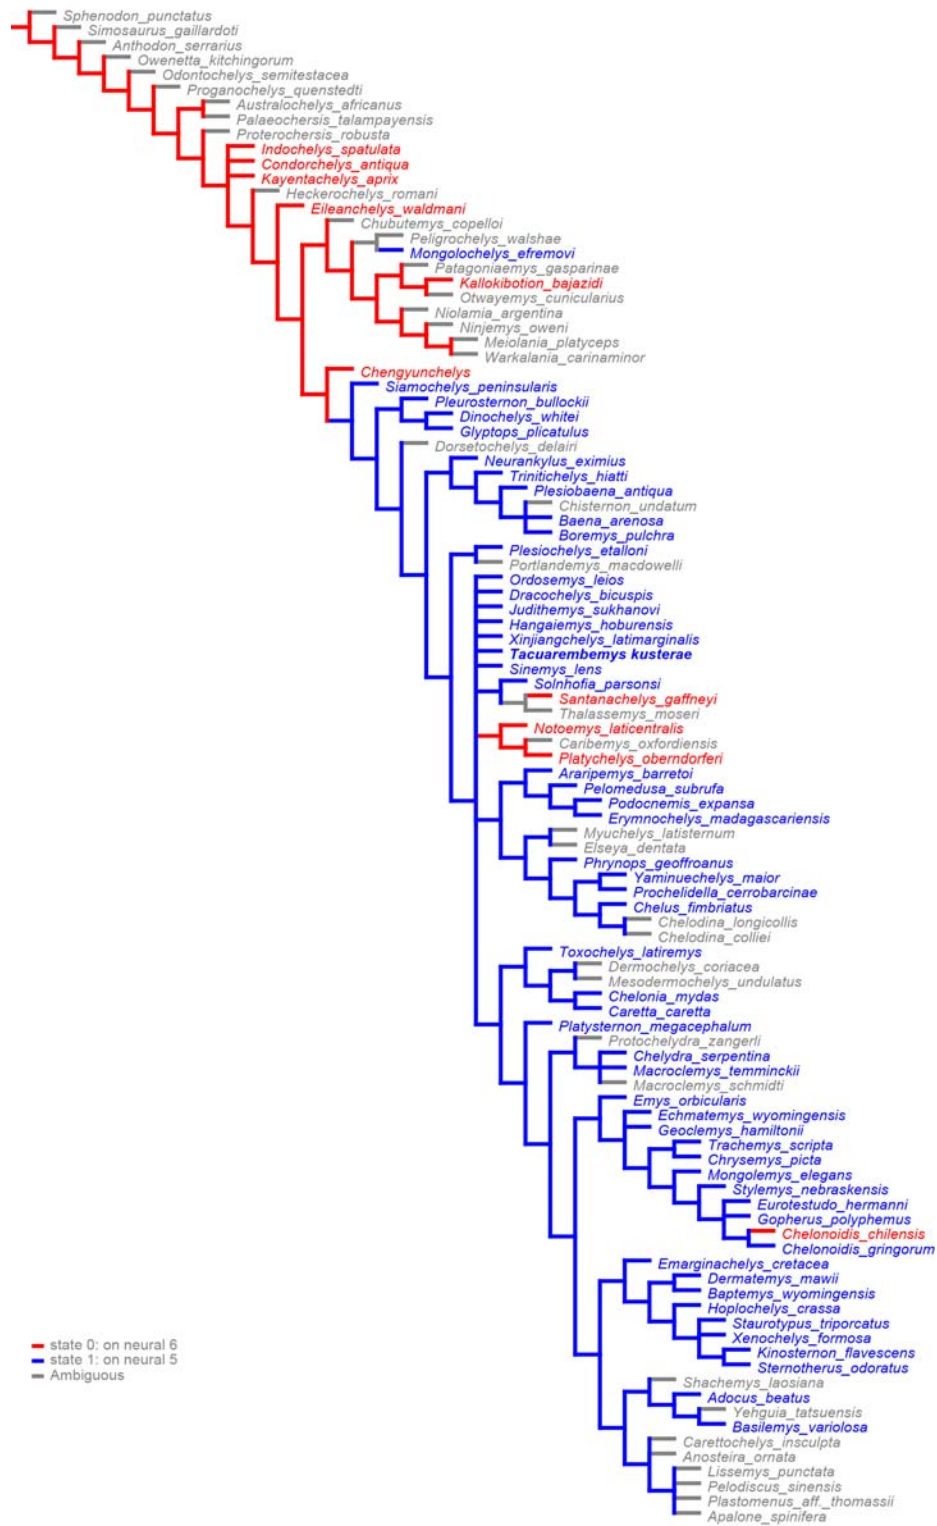

## LITERATURE CITED

- Pol, D., and I. H. Escapa. 2009. Unstable taxa in cladistic analysis: identification and the assessment of relevant characters. *Cladistics* 25:515–527.
